# Supplementary material
Source: PubMed Central journal article supplement (PMC7532983)
Supplement: NIHMS1580730-supplement-1.pdf [file NIHMS1580730-supplement-1.pdf]

**Supplementary Table 1:** Ophthalmic disease diagnoses based on International Classification of Diseases (ICD)-9 and ICD-10 codes and ophthalmological procedures based on Current Procedural Terminology (CPT) codes.

| <b>Diagnosis/ Procedure</b>            | <b>ICD-9/ ICD-10/ CPT codes</b>                                                                                                                                                                                                                                                    |
|----------------------------------------|------------------------------------------------------------------------------------------------------------------------------------------------------------------------------------------------------------------------------------------------------------------------------------|
| Glaucoma                               | 365.1*, 365.2*, 365.3*, 365.4*, 365.5*, 365.6*, 365.7*, 365.8*, 365.9*, H40.1*, H40.2*, H40.3*, H40.4*, H40.5*, H40.6*, H40.8*, H40.9*                                                                                                                                             |
| Age-related macular degeneration (AMD) | 362.50, 362.51, 362.52, H35.30, H35.31*, H35.32*                                                                                                                                                                                                                                   |
| Diabetic retinopathy (DR)              | 249.5*, 250.5*, 362.0*, E08.31*, E08.32*, E08.33*, E08.34*, E08.35*, E08.37*, E09.31*, E09.32*, E09.33*, E09.34*, E09.35*, E09.37*, E10.31*, E10.32*, E10.33*, E10.34*, E10.35*, E10.37*, E11.31*, E11.32*, E11.33*, E11.34*, E11.35*, E11.37*, E13.31*, E13.33*, E13.34*, E13.37* |
| Cataract                               | 366.*, H25.*, H26.*                                                                                                                                                                                                                                                                |
| Uveitis                                | 364.0*, 364.1*, 364.2*, 364.3, H20.0*, H20.1*, H20.2*, H20.8*, H20.9                                                                                                                                                                                                               |
| Ocular trauma                          | 918.*, 921.*, 360.43, 360.5*, 360.6*, 360.8*, 360.9, S05.**X*, H44.6*, H44.7*, H44.8*, H44.9                                                                                                                                                                                       |
| Glaucoma procedures                    | 65800, 65810, 65815 65820 65855, 66150, 66160, 66170, 66172, 66174, 66175, 6617,9 66180, 66183, 66184, 66185, 66500, 66505, 66600, 66605, 66625, 6663,0 66635, 66680, 66761, 66762                                                                                                 |
| Cataract surgery                       | 66982, 66983, 66850, 66852, 66920, 66930, 66940                                                                                                                                                                                                                                    |
