# Supplementary material
Source: PubMed Central journal article supplement (PMC7532983)
Supplement: NIHMS1580730-supplement-2.pdf [file NIHMS1580730-supplement-2.pdf]

**Supplementary Table 2: Multivariable linear regression of IOP with age, sex, smoking status, diagnoses, surgeries, and interaction terms with smoking status**

|                          | <b>Beta</b> | <b>95% CI</b>      | <b>P value</b>          |
|--------------------------|-------------|--------------------|-------------------------|
| <b>Smoking</b>           |             |                    |                         |
| Never smoked             | Reference   | Reference          |                         |
| Past smoker              | 0.769       | 0.746 to 0.792     | < 2 x 10 <sup>-16</sup> |
| Current smoker           | 0.915       | 0.883 to 0.948     | < 2 x 10 <sup>-16</sup> |
| Age (per year of life)   | -0.0104     | -0.0106 to -0.0103 | < 2 x 10 <sup>-16</sup> |
| <b>Sex</b>               |             |                    |                         |
| Male                     | Reference   | Reference          |                         |
| Female                   | 0.095       | 0.091 to 0.020     | < 2 x 10 <sup>-16</sup> |
| Unknown                  | -0.219      | -0.270 to -0.168   | < 2 x 10 <sup>-16</sup> |
| Glaucoma                 | 1.319       | 1.313 to 1.324     | < 2 x 10 <sup>-16</sup> |
| AMD                      | -0.200      | -0.207 to -0.193   | < 2 x 10 <sup>-16</sup> |
| DR                       | 0.387       | 0.381 to 0.394     | < 2 x 10 <sup>-16</sup> |
| Cataract                 | 0.327       | 0.318 to 0.328     | < 2 x 10 <sup>-16</sup> |
| <b>Glaucoma Surgery</b>  |             |                    |                         |
| In 2017                  | 0.596       | 0.575 to 0.617     | < 2 x 10 <sup>-16</sup> |
| Before 2017              | -0.430      | -0.445 to -0.415   | < 2 x 10 <sup>-16</sup> |
| <b>Cataract Surgery</b>  |             |                    |                         |
| In 2017                  | 0.335       | 0.326 to 0.345     | < 2 x 10 <sup>-16</sup> |
| Before 2017              | -0.735      | -0.743 to -0.728   | < 2 x 10 <sup>-16</sup> |
| <b>INTERACTION TERMS</b> | <b>Beta</b> | <b>95% CI</b>      | <b>P value</b>          |
| <b>Age * Smoking</b>     |             |                    |                         |
| Age*Past Smoker          | -0.0119     | -0.0122 to -0.0115 | < 2 x 10 <sup>-16</sup> |

|                                          |         |                    |                        |
|------------------------------------------|---------|--------------------|------------------------|
| Age*Current Smoker                       | 0.0094  | -0.0099 to -0.0088 | $< 2 \times 10^{-16}$  |
| <b>Sex * Smoking</b>                     |         |                    |                        |
| Female*Past Smoker                       | 0.0638  | 0.0553 to 0.0723   | $< 2 \times 10^{-16}$  |
| Female*Current Smoker                    | 0.0632  | 0.0488 to 0.0776   | $< 2 \times 10^{-16}$  |
| Unknown*Past Smoker                      | -0.0561 | -0.1555 to 0.04321 | 0.268                  |
| Unknown*Current Smoker                   | -0.0294 | -0.1963 to 0.1374  | 0.730                  |
| <b>Glaucoma*Smoking</b>                  |         |                    |                        |
| Glaucoma*Past Smoker                     | 0.0546  | 0.0441 to 0.0652   | $< 2 \times 10^{-16}$  |
| Glaucoma*Current Smoker                  | 0.361   | 0.341 to 0.381     | $< 2 \times 10^{-16}$  |
| <b>Cataract*Smoking</b>                  |         |                    |                        |
| Cataract* Past Smoker                    | 0.0237  | 0.0142 to 0.0333   | $1.06 \times 10^{-6}$  |
| Cataract*Current Smoker                  | -0.105  | -0.122 to -0.0883  | $< 2 \times 10^{-16}$  |
| <b>AMD*Smoking</b>                       |         |                    |                        |
| AMD*Past Smoker                          | 0.0350  | 0.0231 to 0.0471   | $9.82 \times 10^{-9}$  |
| AMD*Current Smoker                       | -0.018  | -0.0415 to 0.00636 | 0.150                  |
| <b>Glaucoma Surgery* Smoking</b>         |         |                    |                        |
| Glaucoma Surgery in 2017* Past Smoker    | .0261   | -0.0127 to 0.0649  | 0.187                  |
| Glaucoma Surgery in 2017* Current Smoker | -0.247  | -0.313 to -0.181   | $2.90 \times 10^{-13}$ |

|                                                 |         |                    |                        |
|-------------------------------------------------|---------|--------------------|------------------------|
| Glaucoma Surgery<br>before 2017* Past<br>Smoker | 0.0734  | 0.0477 to 0.0991   | $2.25 \times 10^{-8}$  |
| Glaucoma Surgery<br>before 2017* Past<br>Smoker | -0.181  | -0.237 to -0.126   | $1.59 \times 10^{-10}$ |
| Cataract Surgery*<br>Smoking                    |         |                    |                        |
| Cataract Surgery<br>in 2017* Past Smoker        | -0.0428 | -0.0594 to -0.0261 | $4.86 \times 10^{-7}$  |
| Cataract Surgery in<br>2017* Current<br>Smoker  | -0.101  | -0.128 to -0.0752  | $6.59 \times 10^{-14}$ |
| Cataract Surgery<br>before 2017* Past<br>Smoker | -0.0293 | -0.0424 to -0.0163 | $1.01 \times 10^{-5}$  |
| Cataract Surgery<br>before 2017* Past<br>Smoker | -0.100  | -0.127 to -0.0736  | $1.80 \times 10^{-13}$ |

---
