# Supplementary material
Source: PubMed Central journal article supplement (PMC7532983)
Supplement: NIHMS1580730-supplement-3.pdf [file NIHMS1580730-supplement-3.pdf]

**Supplementary Table 3: Sensitivity analysis for the inclusion of data from both eyes using a multivariable general linear model (GLM) and linear mixed effect model (LMEM) of IOP with age, sex, glaucoma status, and smoking status.**

|                        | GLM with Random Eye |                    | LMEM with All Eyes |                    |
|------------------------|---------------------|--------------------|--------------------|--------------------|
|                        | Beta                | 95% CI             | Beta               | 95% CI             |
| Smoking                |                     |                    |                    |                    |
| Never smoked           | Reference           | Reference          | Reference          | Reference          |
| Past smoker            | 0.0258              | 0.0216 to 0.0301   | 0.0262             | 0.0259 to 0.0264   |
| Current smoker         | 0.390               | 0.383 to 0.397     | 0.3892             | 0.3886 to 0.3897   |
| Age (per year of life) | -0.0130             | -0.0131 to -0.0128 | -0.01297           | -.01298 to -0.1296 |
| Sex                    |                     |                    |                    |                    |
| Male                   | Reference           | Reference          | Reference          | Reference          |
| Female                 | 0.0931              | 0.0894 to 0.0967   | 0.0929             | 0.0927 to 0.0931   |
| Unknown                | -0.234              | -0.276 to -0.191   | -0.228             | -0.231 to -0.225   |
| Glaucoma               | 1.336               | 1.333 to 1.341     | 1.3401             | 1.3398 to 1.3404   |
